# Supplementary material
Source: publisher figshare collection journal article supplement (https://acs.figshare.com/ndownloader/files/5152675)

## Supporting Information

### Photochemical Stability of Pentacene and a Substituted Pentacene in Solution and in Thin Films.

Ashok Maliakal,\* Krishnan Raghavachari,<sup>†</sup> Howard Katz, Edwin Chandross and Theo Siegrist.

*Bell Laboratories, Lucent Technologies, 600 Mountain Avenue, Murray Hill, NJ 07974*

*and <sup>†</sup>Department of Chemistry, Indiana University, Bloomington, IN 47405*

**Figure S-1.** X-Ray Diffractogram for a film of 6,13 bis(triisopropylsilylethynyl)pentacene on quartz. Lines at  $d = 16.86 \text{ \AA}$  and  $5.62 \text{ \AA}$  indicate crystallinity in the thin film. The broad feature with a maximum at  $\sim 22$  degrees is typical for quartz. The layer spacing of  $16.86 \text{ \AA}$  is in close agreement with the value of  $16.83 \text{ \AA}$  reported by Anthony et. al. (J. Am. Chem. Soc. 2001, 9482-9483).

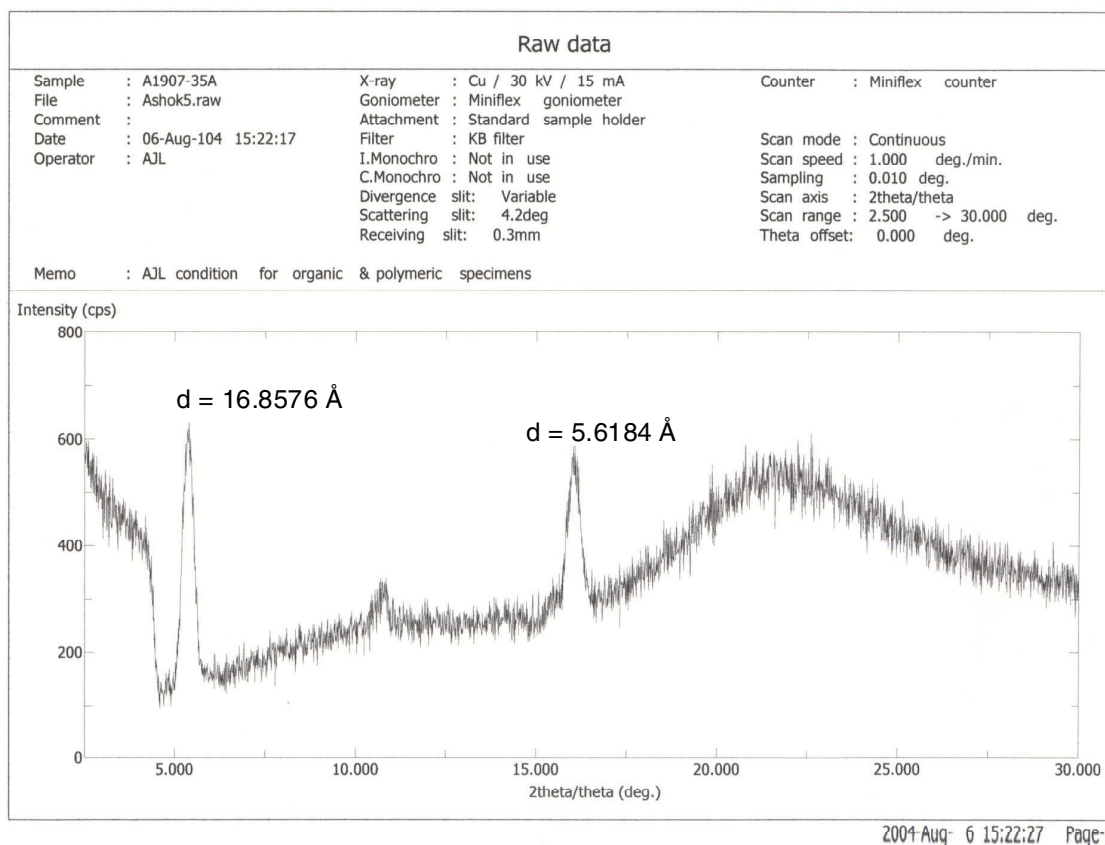

Supplement: Supplementary file 1 [file 5152675]
